# Supplementary material
Source: PubMed Central journal article supplement (PMC2526702)
Supplement: E08-02-0215_1.pdf [file E08-02-0215_1.pdf]

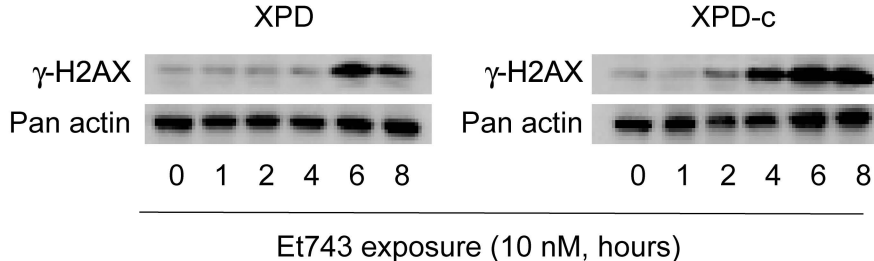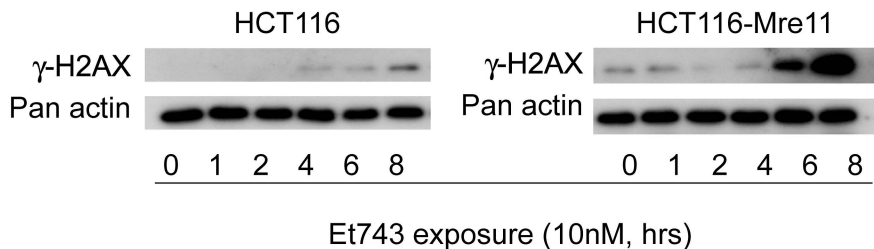

Supplementary Figure 1. Guirouilh-Barbat J. et al.

**Enhanced phosphorylation of H2AX in NER- and Mre11-proficient cells.**

**A:** Differential phosphorylation of H2AX in XPD and complemented XPD-c cells treated with 10 nM Et743 for the indicated times. H2AX phosphorylation was determined by Western-Blotting. Pan Actin is shown as a loading control.

**B:** Differential phosphorylation of H2AX in HCT116 and HCT116-Mre11 (HCT116 complemented for Mre11) cells treated with 10 nM Et743 for the indicated times. H2AX phosphorylation was determined by Western-Blotting. Pan Actin is shown as a loading control.

Et743 (6 hours)

Control

0.05 nM

0.5 nM

10 nM

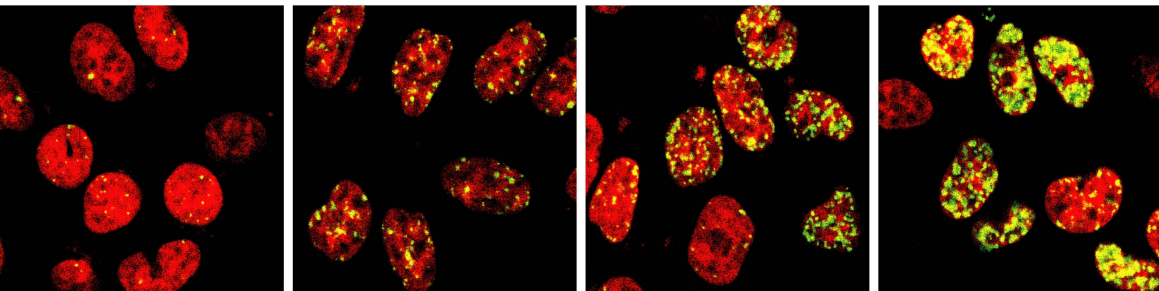

**Supplementary figure 2. Guirouilh-Barbat J. et al.**

**Induction of  $\gamma$ -H2AX foci in HCT116-Mre11 treated with low doses of Et743.**

Representative pictures of HCT116-Mre11 treated with the indicated concentrations of Et743 for 6 hours and analyzed for  $\gamma$ -H2AX foci induction by immunofluorescence.
